# Supplementary material for: Construction of a BiOI/g-C 3 N 4 heterojunction photocatalyst: visible light-mediated efficient and selective oxidation of 5-hydroxymethylfurfural
Source: Royal Society of Chemistry journal article supplement (doi:10.1039/d4nj04937c), 2024-12-30
Supplement: d4nj04937c1.pdf [file d4nj04937c1.pdf]

Fig. S1 Effect of oxidizer dosage on photocatalytic reaction

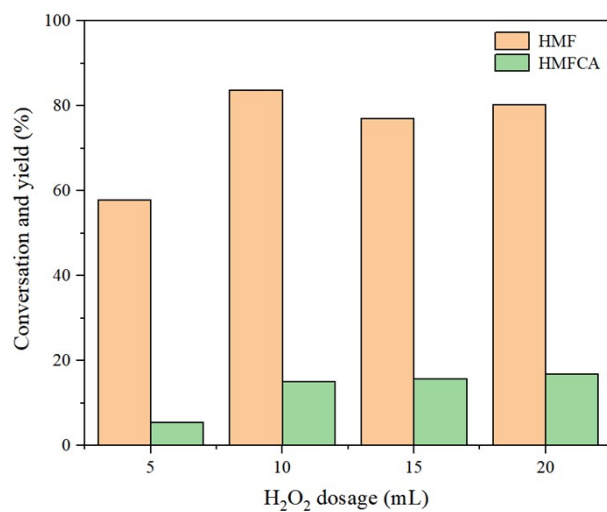

Fig. S1 Effect of oxidizer dosage on photocatalytic reaction (0.005 g HMF, 0.001 g BiOI/g-C<sub>3</sub>N<sub>4</sub>(1.5), 5h)

Fig. S2 Effect of reaction time on photocatalytic reaction

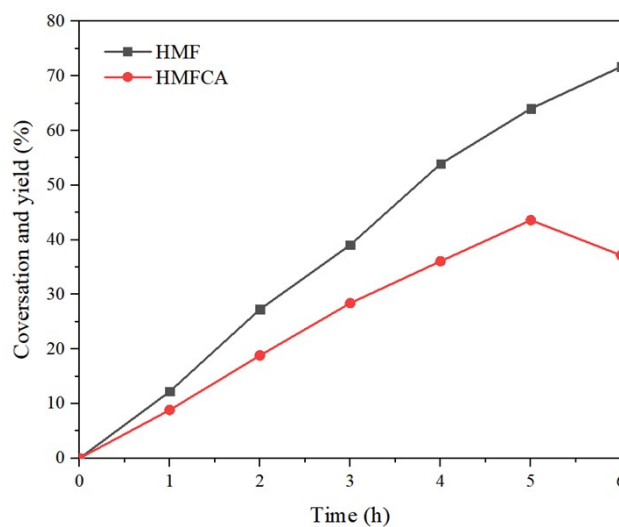

Fig. S2 Effect of reaction time on photocatalytic reaction (0.001 g HMF, 0.05 g BiOI/g-C<sub>3</sub>N<sub>4</sub>(1.5), 20 mL H<sub>2</sub>O<sub>2</sub>).

Fig. S3 SEM images and EDS spectrum of reused BiOI/g - C<sub>3</sub>N<sub>4</sub>.

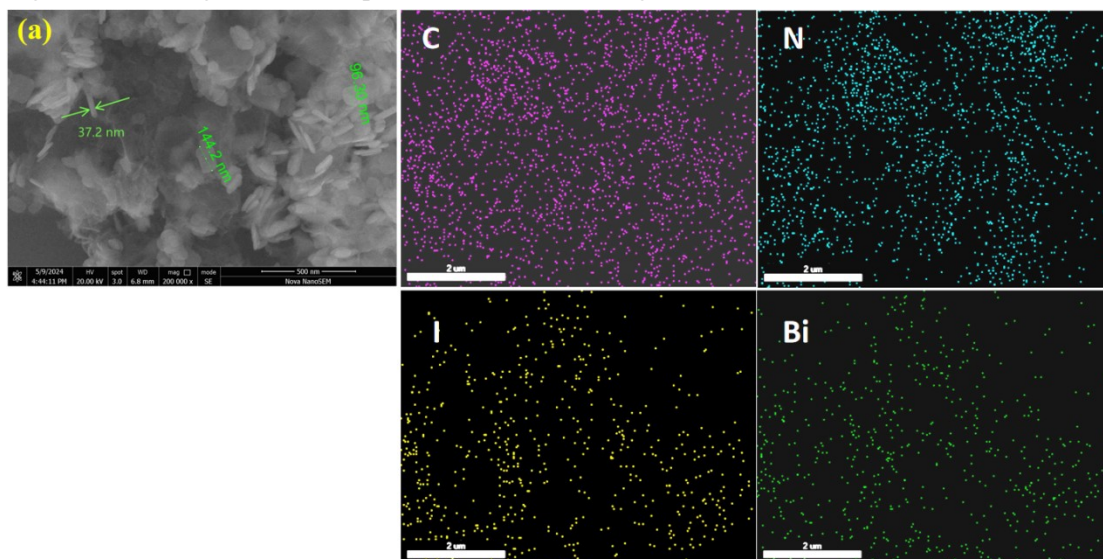

**Fig. S3.** SEM images of (a) reused BiOI/g - C<sub>3</sub>N<sub>4</sub>. EDS spectrum of reused BiOI/g - C<sub>3</sub>N<sub>4</sub>, confirming the presence of C, N, I and Bi elements.

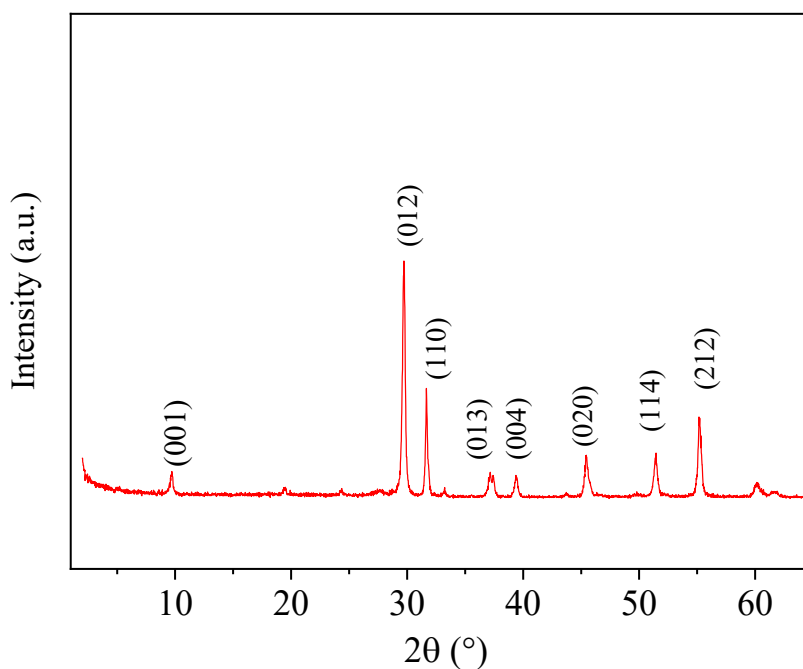

Fig. S4. XRD patterns of reused BiOI/g - C<sub>3</sub>N<sub>4</sub>

**Table S1** Comparison of Photocatalyst Efficiency of BiOI/g-C<sub>3</sub>N<sub>4</sub> with Other Catalysts Described in the Oxidation of HMF to HMFC

| Photocatalyst                                                          | Preparation process                                                                                                                                                                           | Reaction condition                    | Oxidant                       | Light source  | Solvent          | HMFC yield (%) | Ref.       |
|------------------------------------------------------------------------|-----------------------------------------------------------------------------------------------------------------------------------------------------------------------------------------------|---------------------------------------|-------------------------------|---------------|------------------|----------------|------------|
| Au/Na-ZSM                                                              | thermal, 60 °C for 2 h;<br>100 °C, H <sub>2</sub> (1 atm), 6 h.                                                                                                                               | 60 °C, 6 h                            | O <sub>2</sub> (3 bar)        | –             | H <sub>2</sub> O | 90             | [S1]       |
| CuO                                                                    | co-precipitation method;<br>460 °C, 5 h.                                                                                                                                                      | 80 °C, 12 h                           | <i>t</i> -BuOOH               | –             | ACN              | 23.3           | [S2]       |
| Ag/GO/Fe <sub>3</sub> O <sub>4</sub> /γ-Fe <sub>2</sub> O <sub>3</sub> | refluxing method;<br>GO/Fe <sub>3</sub> O <sub>4</sub> /γ-Fe <sub>2</sub> O <sub>3</sub> : 60 °C, 24 h<br>Ag/GO/Fe <sub>3</sub> O <sub>4</sub> /γ-Fe <sub>2</sub> O <sub>3</sub> : 50 °C, 8 h | NaOH, 20 °C, 1.5 h                    | H <sub>2</sub> O <sub>2</sub> | LED 12 W      | ChCl/Gly (1:2)   | 80             | [S3]       |
| Au-Ag/TiO <sub>2</sub>                                                 | incipient wetness impregnation;<br>200 °C                                                                                                                                                     | Na <sub>2</sub> CO <sub>3</sub> , 5 h | high-purity<br>O <sub>2</sub> | Xe lamp 300 W | H <sub>2</sub> O | 4.6            | [S4]       |
| Fe@CeO <sub>2</sub>                                                    | thermal method;<br>220 °C, 9 h                                                                                                                                                                | 24 h                                  | –                             | LED 6W        | DMPO             | 40.4 (FDCA)    | [S5]       |
| Ru-CdS                                                                 | Solvothermal;<br>CdS: 80 °C, 22 h; Ru: 100 °C, 22 h; Ru-CdS: 1.5 h                                                                                                                            | Ar, 17.5 h                            | –                             | Xe lamp 300 W | DMF              | 70.2           | [S6]       |
| BiOI/g-C <sub>3</sub> N <sub>4</sub>                                   | g-C <sub>3</sub> N <sub>4</sub> : melamine<br>decomposition, 550 °C, 3 h<br>BiOI/g-C <sub>3</sub> N <sub>4</sub> : 25 °C, 1 h                                                                 | 20 °C, 5 h                            | H <sub>2</sub> O <sub>2</sub> | Xe lamp 300 W | H <sub>2</sub> O | 43.6           | This study |

## References

- [S1] J. Cai, H. Ma, J. Zhang, Q. Song, Z. Du, Y. Huang, J. Xu  
Gold nanoclusters confined in a supercage of Y zeolite for aerobic oxidation of HMF under mild Conditions  
Chemistry - A European Journal 19(42) (2013), pp.14215–14223
- [S2] F. Wang, Y. Lai, Z Liu, S. Wen, X Liu.  
CopperManganese oxide for highly selective oxidation of 5-hydroxymethylfurfural to bio-monomer 2,5-furandicarboxylic acid  
Biomass convers. Biorefn. 13 (2023), pp.16887–16898
- [S3] P. Ghamari, K.B. Maleki, M. Ghani  
Ag/GO/Fe<sub>3</sub>O<sub>4</sub>/γ-Fe<sub>2</sub>O<sub>3</sub> nanocomposite for green-light-driven photocatalytic oxidation of 5-hydroxymethylfurfural to 5-hydroxymethyl-2-furancarboxylic acid  
ACS Appl. Nano Mater. 7(8) (2024), pp.8765–8782
- [S4] W. Zhang, Q. Li, H. Xia  
Photocatalytic oxidation of 5-hydroxymethylfurfural to furandicarboxylic acid over the Au-Ag/TiO<sub>2</sub> catalysts under visible light irradiation  
[Applied Surface Science](#) 613(15) (2023), pp.156036
- [S5] J.W. Nam, V.N Pham, J.M. Ha, M. Shin, H. Lee, Y.S Youn  
Photocatalysis of Cr- and Fe-doped CeO<sub>2</sub> nanoparticles to selective oxidation of 5-hydroxymethylfurfural  
Nanomaterials 13 (2023), pp.44
- [S6] T. Xia, W. Gong, Y. Chen, M. Duan, J. Ma, X. Cui, Y. Dai, C. Gao, Y. Xiong  
Sunlight-driven highly selective catalytic oxidation of 5-hydroxymethylfurfural towards tunable products  
Angewandte Chemie. 134(29) (2022), pp.e202204225
